# Supplementary material for: Systematic Review of the Inclusion of People With Psychosis in Suicide-Specific Clinical Trials
Source: Atypon-hosted journal article supplement (doi:10.1027/0227-5910/a000628), 2019-10-28
Supplement: 0227-5910_a000628_esm1.pdf [file 0227-5910_a000628_esm1.pdf]

ESM 1.

Table E1. Supplemental table of studies excluding people with psychosis in suicide-specific trials

| <b>Author</b>              | <b>Year</b> | <b>Type of study</b> | <b>Excluded People With Psychosis Y/N</b> | <b>Exclusion Criteria</b>                   |
|----------------------------|-------------|----------------------|-------------------------------------------|---------------------------------------------|
| Burger et al.              | 2016        | drug/device          | Y                                         | history of psychosis                        |
| Fan et al.                 | 2016        | drug/device          | Y                                         | family history of psychosis                 |
| George et al.              | 2014        | drug/device          | Y                                         | diagnosis of psychotic disorder(SCZ or SAD) |
| Grunebaum et al.           | 2011        | drug/device          | Y                                         | current psychosis                           |
| Grunebaum et al.           | 2017        | drug/device          | Y                                         | current psychosis                           |
| Grunebaum et al.           | 2018        | drug/device          | Y                                         | current psychosis                           |
| Hallahan et al.            | 2007        | drug/device          | Y                                         | current psychosis                           |
| Lauterbach et al.          | 2008        | drug/device          | Y                                         | diagnosis of psychotic disorder(SCZ or SAD) |
| Lewitzka et al.            | 2015        | drug/device          | N                                         |                                             |
| Meltzer et al.             | 2003        | drug/device          | N                                         |                                             |
| Murrough et al.            | 2015        | drug/device          | Y                                         | diagnosis of psychotic disorder(SCZ or SAD) |
| Oquendo et al.             | 2011        | drug/device          | N                                         |                                             |
| Price et al.               | 2014        | drug/device          | Y                                         | history of psychosis                        |
| Yovell et al.              | 2016        | drug/device          | Y                                         | diagnosis of psychotic disorder(SCZ or SAD) |
| Zisook et al.              | 2010        | drug/device          | N                                         |                                             |
| Bryan et al.               | 2017        | low intensity        | Y                                         | psychosis interfering with consent          |
| Hassanian-Moghaddam et al. | 2011        | low intensity        | Y                                         | current psychosis                           |
| King et al.                | 2014        | low intensity        | N                                         |                                             |
| Luxton et al.              | 2014        | low intensity        | N                                         |                                             |
| Motto et al.               | 2001        | low intensity        | N                                         |                                             |
| Robinson et al.            | 2012        | low intensity        | N                                         |                                             |
| Wang et al.                | 2016        | low intensity        | N                                         |                                             |
| Sturm et al.               | 2012        | exercise             | N                                         |                                             |
| Almeida et al.             | 2012        | care/case management | N                                         |                                             |
| Aquin et al.               | 2017        | care/case management | N                                         |                                             |
| Aseltine et al.            | 2007        | care/case management | N                                         |                                             |
| Bruce et al.               | 2004        | care/case management | N                                         |                                             |
| Collings et al.            | 2017        | care/case management | N                                         |                                             |

|                       |      |                      |   |                                             |
|-----------------------|------|----------------------|---|---------------------------------------------|
| Comtois et al.        | 2011 | care/case management | Y | psychosis interfering with consent          |
| De Beurs et al.       | 2015 | care/case management | N |                                             |
| Fleischmann et al.    | 2008 | care/case management | N |                                             |
| Ghahramanlou-Holloway | 2014 | care/case management | N |                                             |
| Gizjen et al.         | 2018 | care/case management | N |                                             |
| Gould et al.          | 2013 | care/case management | N |                                             |
| Grimholt et al.       | 2015 | care/case management | Y | current psychosis                           |
| Hooven et al.         | 2012 | care/case management | N |                                             |
| Hvid et al.           | 2011 | care/case management | Y | diagnosis of psychotic disorder(SCZ or SAD) |
| Jobes et al.          | 2018 | care/case management | Y | psychosis interfering with consent          |
| King et al.           | 2006 | care/case management | Y | current psychosis                           |
| King et al.           | 2009 | care/case management | Y | current psychosis                           |
| Morthorst et al.      | 2012 | care/case management | Y | diagnosis of psychotic disorder(SCZ or SAD) |
| Pineda et al.         | 2013 | care/case management | Y | current psychosis                           |
| Ryberg et al.         | 2016 | care/case management | Y | psychosis interfering with consent          |
| Unutzer et al.        | 2006 | care/case management | Y | history of psychosis                        |
| Van Orden et al.      | 2013 | care/case management | Y | current psychosis                           |
| Walsh et al.          | 2001 | care/case management | N |                                             |
| Wasserman et al.      | 2015 | care/case management | N |                                             |
| Zhang et al.          | 2013 | care/case management | Y | current psychosis                           |
| Andreasson et al.     | 2017 | mobile/online        | N |                                             |
| Bush et al.           | 2017 | mobile/online        | N |                                             |
| Cedereke et al.       | 2002 | mobile/online        | N |                                             |
| Celano et al.         | 2017 | mobile/online        | Y | current psychosis                           |
| Kaminer et al.        | 2006 | mobile/online        | Y | diagnosis of psychotic disorder(SCZ or SAD) |
| Kascow et al.         | 2015 | mobile/online        | N |                                             |
| Ligier et al.         | 2016 | mobile/online        | N |                                             |
| Marasinghe et al.     | 2012 | mobile/online        | Y | current psychosis                           |
| Mouaffak et al.       | 2015 | mobile/online        | N |                                             |
| Muhlmann et al.       | 2017 | mobile/online        | N |                                             |
| Robinson et al.       | 2014 | mobile/online        | Y | current psychosis                           |
| Shand et al.          | 2013 | mobile/online        | Y | diagnosis of psychotic disorder(SCZ or SAD) |

|                          |      |                                 |   |                                             |
|--------------------------|------|---------------------------------|---|---------------------------------------------|
| Tighe et al.             | 2017 | mobile/online                   | Y | diagnosis of psychotic disorder(SCZ or SAD) |
| Till et al.              | 2017 | mobile/online                   | N |                                             |
| Van Spijker et al.       | 2014 | mobile/online                   | N |                                             |
| Van Spijker et al.       | 2015 | mobile/online                   | Y | diagnosis of psychotic disorder(SCZ or SAD) |
| Abdollahi et al.         | 2017 | more than one intervention type | Y | psychosis interfering with consent          |
| Bateman et al.           | 2009 | more than one intervention type | Y | diagnosis of psychotic disorder(SCZ or SAD) |
| Chen et al.              | 2013 | more than one intervention type | N |                                             |
| Donaldson et al.         | 2005 | more than one intervention type | Y | current psychosis                           |
| Miller at al.            | 2016 | more than one intervention type | Y | current psychosis                           |
| Raj et al.               | 2001 | more than one intervention type | Y | current psychosis                           |
| Randell et al.           | 2001 | more than one intervention type | N |                                             |
| Rucci et al.             | 2011 | more than one intervention type | Y | current psychosis                           |
| Simon et al.             | 2016 | more than one intervention type | N |                                             |
| Wilks et al.             | 2018 | more than one intervention type | Y | diagnosis of psychotic disorder(SCZ or SAD) |
| Alavi et al.             | 2013 | psychotherapy                   | Y | diagnosis of psychotic disorder(SCZ or SAD) |
| Andreasson et al.        | 2014 | psychotherapy                   | Y | diagnosis of psychotic disorder(SCZ or SAD) |
| Andreoli et al.          | 2016 | psychotherapy                   | Y | diagnosis of psychotic disorder(SCZ or SAD) |
| Armitage et al.          | 2016 | care/case management            | N |                                             |
| Asarnow et al.           | 2017 | psychotherapy                   | Y | psychosis interfering with consent          |
| Brown et al.             | 2005 | psychotherapy                   | N |                                             |
| Capron et al.            | 2014 | psychotherapy                   | Y | current psychosis                           |
| Davidson et al.          | 2006 | psychotherapy                   | Y | diagnosis of psychotic disorder(SCZ or SAD) |
| Diamond et al.           | 2010 | psychotherapy                   | Y | current psychosis                           |
| Esposito-Smythers        | 2011 | psychotherapy                   | Y | current psychosis                           |
| Esposito-Smythers et al. | 2017 | psychotherapy                   | Y | current psychosis                           |
| Fitzpatrick et al.       | 2005 | psychotherapy                   | N |                                             |

|                       |      |               |   |                                             |
|-----------------------|------|---------------|---|---------------------------------------------|
| Goodman et al.        | 2016 | psychotherapy | Y | diagnosis of psychotic disorder(SCZ or SAD) |
| Guthrie et al.        | 2001 | psychotherapy | N |                                             |
| Gysin-Maillart et al. | 2016 | psychotherapy | Y | diagnosis of psychotic disorder(SCZ or SAD) |
| Harned et al.         | 2014 | psychotherapy | Y | diagnosis of psychotic disorder(SCZ or SAD) |
| Huey et al.           | 2004 | psychotherapy | N |                                             |
| Kline et al.          | 2016 | psychotherapy | Y | current psychosis                           |
| LaCroix et al.        | 2018 | psychotheraoy | Y | current psychosis                           |
| Linehan et al.        | 2006 | psychotherapy | Y | diagnosis of psychotic disorder(SCZ or SAD) |
| Linehan et al.        | 2015 | psychotherapy | Y | diagnosis of psychotic disorder(SCZ or SAD) |
| McMain et al.         | 2009 | psychotherapy | Y | diagnosis of psychotic disorder(SCZ or SAD) |
| McMain et al.         | 2017 | psychotherapy | Y | diagnosis of psychotic disorder(SCZ or SAD) |
| McMain et al.         | 2018 | psychotherapy | Y | diagnosis of psychotic disorder(SCZ or SAD) |
| Mehlum et al.         | 2014 | psychotherapy | Y | diagnosis of psychotic disorder(SCZ or SAD) |
| Morey et al.          | 2010 | psychotherapy | N |                                             |
| Morley et al.         | 2014 | psychotherapy | Y | diagnosis of psychotic disorder(SCZ or SAD) |
| Norr et al.           | 2018 | psychotherapy | Y | history of psychosis                        |
| O'Connor et al.       | 2017 | psychotherapy | N |                                             |
| Phillips et al.       | 2018 | psychotherapy | Y | diagnosis of psychotic disorder(SCZ or SAD) |
| Pistorello et al.     | 2012 | psychotherapy | Y | current psychosis                           |
| Power et al.          | 2003 | psychotherapy | N |                                             |
| Pratt et al.          | 2015 | psychotherapy | N |                                             |
| Raines et al.         | 2015 | psychotherapy | Y | diagnosis of psychotic disorder(SCZ or SAD) |
| Rossouw et al.        | 2012 | psychotherapy | Y | diagnosis of psychotic disorder(SCZ or SAD) |
| Rudd et al.           | 2015 | psychotherapy | Y | psychosis interfering with consent          |
| Sinniah et al.        | 2017 | psychotherapy | Y | diagnosis of psychotic disorder(SCZ or SAD) |
| Tang et al.           | 2009 | psychotherapy | Y | current psychosis                           |
| Tarrier et al.        | 2014 | psychotherapy | N |                                             |

|                        |      |               |   |                                             |
|------------------------|------|---------------|---|---------------------------------------------|
| Tyrer et al.           | 2003 | psychotherapy | Y | diagnosis of psychotic disorder(SCZ or SAD) |
| Van Beek et al.        | 2009 | psychotherapy | Y | current psychosis                           |
| Van den Bosch et al.   | 2014 | psychotherapy | Y | diagnosis of psychotic disorder(SCZ or SAD) |
| Verheul et al.         | 2003 | psychotherapy | Y | diagnosis of psychotic disorder(SCZ or SAD) |
| Ward-Ciesielski et al. | 2016 | psychotherapy | N |                                             |
| Weinberg et al.        | 2006 | psychotherapy | Y | diagnosis of psychotic disorder(SCZ or SAD) |
| Weinstein et al.       | 2017 | psychotherapy | Y | current psychosis                           |
| Wittouck et al.        | 2014 | psychotherapy | N |                                             |
| Wood et al.            | 2001 | psychotherapy | Y | diagnosis of psychotic disorder(SCZ or SAD) |

## References

- Abdollahi, A., LeBouthillier, D. M., Najafi, M., Asmundson, G. J. G., Hosseinian, S., Shahidi, S., ...Jalili, M. (2017). Effect of exercise augmentation of cognitive behavioural therapy for the treatment of suicidal ideation and depression. *Journal of Affective Disorders*, 219, 58-63. doi: 10.1016/j.jad.2017.05.012
- Alavi, A., Sharifi, B., Ghanizadeh, A., & Dehbozorgi, G. (2013). Effectiveness of cognitive-behavioral therapy in decreasing suicidal ideation and hopelessness of the adolescents with previous suicidal attempts. *Iranian journal of pediatrics*, 23(4), 467-72. DOI: 10.1016/j.neurenf.2012.04.266
- Almeida, O. P., Pirkis, J., Kerse, N., Sim, M., Flicker, L., Snowdon, J., Draper, B., ... Pfaff, J. J. (2012). A randomized trial to reduce the prevalence of depression and self-harm behavior in older primary care patients. *Annals of family medicine*, 10(4), 347-56. doi: 10.1370/afm.1368
- Andreasson, K., Krogh, J., Rosenbaum, B., Gluud, C., Jobes, D. A., & Nordentoft, M. (2014). The DiaS trial: Dialectical behavior therapy versus collaborative assessment and management of suicidality on self-harm in patients with a recent suicide attempt and borderline personality disorder traits - study protocol for a randomized controlled trial. *Trials*, 15, 194. doi:10.1186/1745-6215-15-194
- Andreasson, K., Krogh, J., Bech, P., Frandsen, H., Buus, N., Stanley, B., ... Erlangsen, A. (2017). MYPLAN -mobile phone application to manage crisis of persons at risk of suicide: Study protocol for a randomized controlled trial. *Trials*, 18(1), 171. doi:10.1186/s13063-017-1876-9
- Andreoli, A., Burnand, Y., Cochenec, M.-F., Ohlendorf, P., Frambati, L., Gaudry-Maire, D.,

- ...Di Clemente, T.h. (2016). Disappointed love and suicide: A randomized controlled trial of “Abandonment Psychotherapy” among borderline patients. *Journal of Personality Disorders, 30*(2), 271-287. [https://doi.org/10.1521/pedi\\_2015\\_29\\_196](https://doi.org/10.1521/pedi_2015_29_196)
- Aquin, J. P., Roos, L. E., Distasio, J., Katz, L. Y., Bourque, J., Bolton, J. M., ...Sareen, J. (2017). Effect of housing first on suicidal behaviour: A randomised controlled trial of homeless adults with mental disorders. *Canadian journal of psychiatry. Revue canadienne de psychiatrie, 62*(7), 473-481. doi: 10.1177/0706743717694836
- Armitage, C. J., Rahim, W. A., Rowe, R., & O’Connor, R. C. (2016). An exploratory randomised trial of a simple, brief psychological intervention to reduce subsequent suicidal ideation and behaviour in patients admitted to hospital for self-harm. *British Journal of Psychiatry, 208*(5), 470-476. doi: 10.1192/bjp.bp.114.162495
- Asarnow, J. R., Hughes, J. L., Babeva, K. N., & Sugar, C. A. (2017). Cognitive-behavioral family treatment for suicide attempt prevention: A randomized controlled trial. *Journal of the American Academy of Child and Adolescent Psychiatry, 56*(6), 506-514.  
doi: [10.1016/j.jaac.2017.03.015]
- Aseltine, R. H., James, A., Schilling, E. A., & Glatovsky, J. (2007). Evaluating the SOS suicide prevention program: A replication and extension. *BMC public health, 7*, 161.  
doi:10.1186/1471-2458-7-161
- Bateman, A. and Fonagy, P. (2009). Randomized controlled trial of outpatient mentalization-based treatment versus structured clinical management for borderline personality disorder. *American Journal of Psychiatry, 166*(12), 1355-1364.  
doi: 10.1176/appi.ajp.2009.09040539
- Brown, G. K., Ten Have, T., Henriques, G. R., Xie, S. X., Hollander, J. E., & Beck, A.T.

- (2005). Cognitive therapy for the prevention of suicide attempts: A randomized controlled trial. *Jama*, 294(5), 563-570. doi:10.1001/jama.294.5.563
- Bruce, M. L., Ten Have, T. R., Reynolds, C. F. 3<sup>rd</sup>, Katz, II, Schulberg, H. C., Mulsant, B. H., ...Alexopoulos, G. S. (2004). Reducing suicidal ideation and depressive symptoms in depressed older primary care patients: A randomized controlled trial. *Jama*, 291(9), 1081-1091. doi:10.1001/jama.291.9.1081
- Bryan, C. J., Mintz, J., Clemans, T. A., Leeson, B., Burch, T. S., Williams, S. R., Maney, E., & Rudd, M. D. (2017). Effect of crisis response planning vs. contracts for safety on suicide risk in U.S. Army soldiers: A randomized clinical trial. *Journal of Affective Disorders*, 212, 64-72. [doi.org/10.1016/j.jad.2017.01.028](https://doi.org/10.1016/j.jad.2017.01.028)
- Burger, J., Capobianco, M., Lovern, R., Boche, B., Ross, E., Darracq, M. A., & McLay, R. (2016). A double-blinded, randomized, placebo-controlled sub-dissociative dose ketamine pilot study in the treatment of acute depression and suicidality in a military emergency department setting. *Military Medicine*, 181(10), 1195-1199. doi.org/10.7205/MILMED-D-15-00431
- Bush, N. E., Smolenski, D. J., Denneson, L. M., Williams, H. B., Thomas, E. K., & Dobscha, S. K. (2017). A virtual hope box: Randomized controlled trial of a smartphone app for emotional regulation and coping with distress. *Psychiatry Services*, 68(4), 330-336. doi: 10.1176/appi.ps.201600283
- Capron, D. W., Norr, A. M., Zvolensky, M. J., & Schmidt, N. B. (2013). Prospective evaluation of the effect of an anxiety sensitivity intervention on suicidality among smokers. *Cognitive behaviour therapy*, 43(1), 72-82. doi: [10.1080/16506073.2013.777466]



- Cedereke, M., Monti, K., & Ojehagen, A. (2002). Telephone contact with patients in the year after a suicide attempt: does it affect treatment attendance and outcome? A randomised controlled study. *European Psychiatry, 17*(2), 82-91.  
DOI: 10.1016/S0924-9338(02)00632-6
- Celano, C. M., Beale, E. E., Mastromauro, C. A., Stewart, J. G., Millstein, R. A., Auerbach, R., ... Huffman, J. C. (2016). Psychological interventions to reduce suicidality in high-risk patients with major depression: A randomized controlled trial. *Psychological medicine, 47*(5), 810-821. doi: 10.1017/S0033291716002798
- Chen, W.-J., Ho, C.-K., Shyu, S.-S., Chen, C.-C., Lin, G.-G., Chou, L.-S., ...Chou, F., H.-C. (2013). Employing crisis postcards with case management in Kaohsiung, Taiwan: 6-month outcomes of a randomised controlled trial for suicide attempters. *BMC Psychiatry, 13*(1), 191. doi: [10.1186/1471-244X-13-191]
- Collings, S., Jenkin, G., Stanley, J., McKenzie, S., & Hatcher, S. (2018). Preventing suicidal behaviours with a multilevel intervention: A cluster randomised controlled trial. *BMC public health, 18*(1), 140. doi:10.1186/s12889-018-5032-6
- Comtois, K. A., Jobes, D. A., S. O' Connor, S., Atkins, D. C., Janis, K., E. Chessen, C., ...Yuodelis-Flores, C. (2011). Collaborative assessment and management of suicidality (CAMS): Feasibility trial for next-day appointment services. *Depression and Anxiety, 28*(11), 963-972. doi: 10.1002/da.20895
- Davidson, K., Norrie, J., Tyrer, P., Gumley, A., Tata, P., Murray, H., & Palmer, S. (2006). The effectiveness of cognitive behavior therapy for borderline personality disorder: Results from the borderline personality disorder study of cognitive therapy (BOSCOT) trial. *Journal of personality disorders, 20*(5), 450-65. doi: [10.1521/pedi.2006.20.5.450]

- de Beurs, D. P., Bosmans, J. E., de Groot, M. H., de Keijser, J., van Dujin, E., de Winter, R. F., & Kerkhof, A. J. (2015). Training mental health professionals in suicide practice guideline adherence: Cost-effectiveness analysis alongside a randomized controlled trial. *Journal of Affective Disorders, 186*, 203-210. doi: 10.1016/j.jad.2015.07.028
- Diamond, G. S., Wintersteen, M. B., Brown, G. K., Diamond, G. M., Gallop, R., Shelef, K., & Levy, S. (2010). Attachment-based family therapy for adolescents with suicidal ideation: A randomized controlled trial. *Journal of the American Academy of Child and Adolescent Psychiatry, 49*(2), 122-131. DOI: 10.1097/00004583-201002000-00006
- Donaldson, D., Spirito, A., & Esposito-Smythers, C. (2005). Treatment for adolescents following a suicide attempt: Results of a pilot trial. *Journal of the American Academy of Child and Adolescent Psychiatry, 44*(2), 113-120. doi.org/10.1097/00004583-200502000-00003
- Esposito-Smythers, C., Spirito, A., Kahler, C. W., Hunt, J., & Monti, P. (2011). Treatment of co-occurring substance abuse and suicidality among adolescents: A randomized trial. *Journal of consulting and clinical psychology, 79*(6), 728-39. doi: 10.1037/a0026074
- Esposito-Smythers, C., Hadley, W., Curby, T. W., & Brown, L. K. (2016). Randomized pilot trial of a cognitive-behavioral alcohol, self-harm, and HIV prevention program for teens in mental health treatment. *Behaviour research and therapy, 89*, 49-56. doi: [10.1016/j.brat.2016.11.005]
- Fan, W., Yang, H., Sun, Y., Zhang, J., Li, G., Zheng, Y., & Liu, Y. (2016). Ketamine rapidly relieves acute suicidal ideation in cancer patients: A randomized controlled clinical trial. *Oncotarget, 8*(2), 2356-2360. doi: [10.18632/oncotarget.13743]

- Fitzpatrick, K. K., Witte, T. K., & Schmidt, N. B. (2005). Randomized controlled trial of a brief problem-orientation intervention for suicidal ideation. *Behavior Therapy, 36*(4), 323-333. doi.org/10.1016/S0005-7894(05)80114-5
- Fleischmann, A., Bertolote, J. M., Wasserman, D., De Leo, D., Bolhari, J., Botega, N. J., De Silva, ... Thanh, H. T. (2008). Effectiveness of brief intervention and contact for suicide attempters: a randomized controlled trial in five countries. *Bulletin of the World Health Organization, 86*(9), 703-9. DOI: 10.2471/BLT.07.046995
- George, M. S., et al. (2014). A two-site pilot randomized 3 day trial of high dose left prefrontal repetitive transcranial magnetic stimulation (rTMS) for suicidal inpatients. *Brain Stimulation, 7*(3), 421-431. doi: 10.1016/j.brs.2014.03.006
- Ghahramanlou-Holloway, M., Brown, G. K., Currier, G. W., Brenner, L., Knox, K. L., Grammer, G., ... Stanley, B. (2014). Safety Planning for Military (SAFE MIL): Rationale, design, and safety considerations of a randomized controlled trial to reduce suicide risk among psychiatric inpatients. *Contemporary Clinical Trials, 39*(1), 113-123. doi: 10.1016/j.cct.2014.07.003
- Gijzen, M., Creemers, D., Rasing, S., Smit, F., & Engels, R. (2018). Evaluation of a multimodal school-based depression and suicide prevention program among Dutch adolescents: Design of a cluster-randomized controlled trial. *BMC psychiatry, 18*(1), 124. doi:10.1186/s12888-018-1710-2
- Goodman, M., Banthin, D., Blair, N. J., Mascitelli, K. A., Wilsnack, J., Chen, J., ... New, A. S. al. (2016). A randomized trial of dialectical behavior therapy in high-risk suicidal veterans. *Journal of Clinical Psychiatry, 77*(12), e1591-e1600. doi: 10.4088/JCP.15m10235

- Gould, M. S., Cross, W., Pisani, A. R., Munfakh, J. L., & Kleinman, M. (2013). Impact of applied suicide intervention skills training on the national suicide prevention lifeline. *Suicide & life-threatening behavior, 43*(6), 676-91. doi: 10.1111/sltb.12049
- Grimholt, T. K., Jacobsen, D., Haavet, O. R., Sandvik, L., Jorgensen, T., Norheim, A. B., & Ekeberg, O. (2015). Effect of systematic follow-up by general practitioners after deliberate self-poisoning: a randomised controlled trial. *PloS one, 10*(12), e0143934. doi:10.1371/journal.pone.0143934
- Grunebaum, M. F., Ellis, S. P., Duan, N., Burke, A. K., Oquendo, M. A., & John Mann, J. (2011). Pilot randomized clinical trial of an SSRI vs bupropion: Effects on suicidal behavior, ideation, and mood in major depression. *Neuropsychopharmacology: official publication of the American College of Neuropsychopharmacology, 37*(3), 697-706. doi: 10.1038/npp.2011.247
- Grunebaum, M. F., Ellis, S. P., Keilp, J. G., Moitra, V. K., Cooper, T. B., Marver, J. E., ... Mann, J. J. (2017). Ketamine versus midazolam in bipolar depression with suicidal thoughts: A pilot midazolam-controlled randomized clinical trial. *Bipolar Disorders, 19*(3), 176-183. doi: [10.1176/appi.ajp.2017.17060647]
- Grunebaum, M. F., Galfalvy, H. C., Choo, T. H., Keilp, J. G., Moitra, V. K., Parris, M. S., ... Mann, J. J. (2018). Ketamine for rapid reduction of suicidal thoughts in major depression: A midazolam-controlled randomized clinical trial. *American Journal of Psychiatry, 175*(4), 327-335. doi: 10.1176/appi.ajp.2017.17060647
- Guthrie, E., Kapur, N., Mackway-Jones, K., Chew-Graham, C., Moorey, J., Mendel, E., ... Tomenson, B. (2001). Randomised controlled trial of brief psychological intervention after deliberate self-poisoning. *BMJ (Clinical research ed.), 323*(7305), 135-8.

doi: <https://doi.org/10.1136/bmj.323.7305.135>

Gysin-Maillart, A., Schwab, S., Soravia, L., Megert, M., & Michel, K. (2016). A novel brief therapy for patients who attempt suicide: A 24-months follow-up randomized controlled study of the Attempted Suicide Short Intervention Program (ASSIP). *PLoS medicine*, *13*(3), e1001968. doi:10.1371/journal.pmed.1001968

Hallahan, B., Hibbeln, J. R., Davis, J. M., & Garland, M. R. (2007). Omega-3 fatty acid supplementation in patients with recurrent self-harm. Single-centre double-blind randomised controlled trial. *The British Journal of Psychiatry*, *190*(2), 118-122. DOI: 10.1192/bjp.bp.106.022707

Harned, M. S., Korslund, K. E., & Linehan, M. M. (2014). A pilot randomized controlled trial of Dialectical Behavior Therapy with and without the Dialectical Behavior Therapy Prolonged Exposure protocol for suicidal and self-injuring women with borderline personality disorder and PTSD. *Behaviour research and therapy*, *55*, 7-17. doi: 10.1016/j.brat.2014.01.008

Hassanian-Moghaddam, H., Sariami, S., Kolahi, A., & Carter, G. (2011). Postcards in Persia: Randomized controlled trial to reduce suicidal behaviours 12 months after hospital-treated self-poisoning. *British Journal of Psychiatry*, *198*(4), 309-316. doi: 10.1192/bjp.bp.109.067199

Hooven, C., Walsh, E., Pike, K. C., & Herting, J. R. (2012). Promoting CARE: Including parents in youth suicide prevention. *Family & community health*, *35*(3), 225-35. doi: 10.1097/FCH.0b013e318250bcf9

Huey, S. J., Jr., Henggeler, S. W., Rowland, M. D., Halliday-Boykins, C. A., Cunningham, P. B., Pickrel, S. G., & Edwards, J. (2004). Multisystemic therapy effects on attempted suicide

by youths presenting psychiatric emergencies. *Journal of the American Academy of Child & Adolescent Psychiatry*, 43(2), 183-190.

<http://dx.doi.org/10.1097/00004583-200402000-00014>

Hvid, M., Vangborg, K., Sorensen, H. J., Nielsen, I. K., Stenborg, J. M., & Wang, A. G. (2011).

Preventing repetition of attempted suicide--II. The Amager project, a randomized controlled trial. *Nordic Journal of Psychiatry*, 65(5), 292-298.

doi:10.3109/08039488.2010.544404

Jobes, D. A., Comtois, K. A., Gutierrez, P. M., Brenner, L. A., Huh, D., Chalker, S. A., ...Crow,

B. (2017). A randomized controlled trial of the collaborative assessment and management of suicidality versus enhanced care as usual with suicidal soldiers. *Psychiatry*, 80(4), 339-

356. <http://dx.doi.org/10.1080/00332747.2017.1354607>

Kaminer, Y., Burlison, J. A., Goldston, D. B., & Burke, R.H. (2006). Suicidal Ideation among

adolescents with alcohol use disorders during treatment and aftercare. *The American Journal on Addictions*, 15(s1): s43-s49. doi.org/10.1080/10550490601006154

Kasckow, J., Gao, S., Hanusa, B., Rotondi, A., Chinman, M., Zickmund, S., ...Haas, G. L.

(2015). Telehealth monitoring of patients with schizophrenia and suicidal ideation. *Suicide and Life Threatening Behavior*, 45(5), 600-611. doi: 10.1111/sltb.12154

King, C. A., Klaus, N., Kramer, A., Venkataraman, S., Quinlan, P., & Gillespie, B. (2009). The

Youth-Nominated Support Team-Version II for suicidal adolescents: A randomized controlled intervention trial. *Journal of consulting and clinical psychology*, 77(5), 880-93. doi: [10.1037/a0016552]

King, C. A., Klaus, N., Kramer, A., Venkataraman, S., Quinlan, P., & Gillespie, B. (2009). The

Youth-Nominated Support Team-Version II for suicidal adolescents: A randomized

controlled intervention trial. *Journal of consulting and clinical psychology*, 77(5), 880-93. <http://dx.doi.org/10.1037/a0016552>

King, C. A., Gipson, P. Y., Horwitz, A. G., & Opperman, K. J. (2014). Teen options for change: An intervention for young emergency patients who screen positive for suicide risk. *Psychiatric services (Washington, D.C.)*, 66(1), 97-100.  
doi: [10.1176/appi.ps.201300347]

Kline, A., Chesin, M., Latorre, M., Miller, R., St Hill, L., Shcherbakov, A., ... Interian, A. (2016). Rationale and study design of a trial of mindfulness-based cognitive therapy for preventing suicidal behavior (MBCT-S) in military veterans. *Contemporary Clinical Trials*, 50, 245-252. doi: 10.1016/j.cct.2016.08.015

LaCroix, J. M., Perera, K. U., Neely, L. L., Grammer, G., Weaver, J., & Ghahramanlou-Holloway, M. (2018). Pilot trial of post-admission cognitive therapy: inpatient program for suicide prevention. *Psychological Services*, 15(3), 279-288. doi: 10.1037/ser0000224

Lauterbach, E., Felber, W., Müller-Oerlinghausen, B., Ahrens, B., Bronisch, T., Meyer, T., ... Hohagen, F. (2008). Adjunctive lithium treatment in the prevention of suicidal behaviour in depressive disorders: A randomised, placebo-controlled, 1-year trial. *Acta Psychiatrica Scandinavica*, 118, 469-479. doi: 10.1111/j.1600-0447.2008.01266.x

Lewitzka, U., Jabs, B., Fülle, M., Holthoff, V., Juckel, G., Uhl, I., ... Bauer, M. (2015). Does lithium reduce acute suicidal ideation and behavior? A protocol for a randomized, placebo-controlled multicenter trial of lithium plus Treatment As Usual (TAU) in patients with suicidal major depressive episode. *BMC Psychiatry*, 15, 117. doi:10.1186/s12888-015-0499-5

- Ligier, F., Kabuth, B., & Guillemin, F. (2016). MEDIACONNEX: A multicenter randomised trial based on short message service to reduce suicide attempt recurrence in adolescents. *BMC Psychiatry, 16*, 251. doi:10.1186/s12888-016-0965-8
- Linehan, M. M., Comtois, K. A., Murray, A. M., Brown, M. Z., Gallop, R. J., Heard, H. L., ...Korslund, K. E. (2006). Two-year randomized controlled trial and follow-up of dialectical behavior therapy vs therapy by experts for suicidal behaviors and borderline personality disorder. *Archives of General Psychiatry, 63*(7),757–766.  
doi:10.1001/archpsyc.63.7.757
- Linehan, M. M., Korslund, K. E., Harned, M. S., Gallop, R. J., Lungu, A., Neacsiu, A. D., ...Murray-Gregory, A. M. (2015). Dialectical behavior therapy for high suicide risk in individuals with borderline personality disorder: A randomized clinical trial and component analysis. *JAMA Psychiatry, 72*(5), 475–482.  
doi:10.1001/jamapsychiatry.2014.3039
- Luxton, D. D., Thomas, E. K., Chipps, J., Relova, R. M., Brown, D., McLay, R., ... Smolenski, D. J. (2014). Caring letters for suicide prevention: implementation of a multi-site randomized clinical trial in the U.S. military and Veteran Affairs healthcare systems. *Contemporary Clinical Trials, 37*(2), 252-260. doi: 10.1016/j.cct.2014.01.007
- Marasinghe, R. B., Edirippulige, S., Kavanagh, D., Smith, A., & Jiffry, M. T. (2012). Effect of mobile phone-based psychotherapy in suicide prevention: a randomized controlled trial in Sri Lanka. *Journal of Telemedicine and Telecare, 18*(3), 151-155.  
doi: 10.1258/jtt.2012.SFT107
- McMain, S. F., Links, P. S., Gnam, W. H., Guimond, T., Cardish, R. J., Korman, L., & Streiner,



- D. L. (2009). A randomized trial of dialectical behavior therapy versus general psychiatric management for borderline personality disorder. *American Journal of Psychiatry*, *166*(12), 1365-1374. doi: 10.1176/appi.ajp.2009.09010039
- McMain, S. F., Guimond, T., Barnhart, R., Habinksi, L., & Streiner, D. L. (2017). A randomized trial of brief dialectical behaviour therapy skills training in suicidal patients suffering from borderline disorder. *Acta Psychiatrica Scandinavica*, *135*(2), 138-148. doi: 10.1111/acps.12664
- McMain, S. F., Chapman, A. L., Kuo, J. R., Guimond, T., Streiner, D. L., Dixon-Gordon, K. L., Isaranuwatthai, W., ... Hoch, J. S. (2018). The effectiveness of 6 versus 12-months of dialectical behaviour therapy for borderline personality disorder: the feasibility of a shorter treatment and evaluating responses (FASTER) trial protocol. *BMC psychiatry*, *18*(1), 230. doi:10.1186/s12888-018-1802-z
- Mehlum, L., Tormoen, A. J., Ramberg, M., Haga, E., Diep, L. M., Laberg, S., ... Groholt, B. (2014). Dialectical behavior therapy for adolescents with repeated suicidal and self-harming behavior: A randomized trial. *Journal of the American Academy of Child and Adolescent Psychiatry*, *53*(10), 1082-1091. doi: 10.1016/j.jaac.2014.07.003
- Meltzer, H. Y., Alphas, L., Green, A. I., Altamura, A. C., Anand, R., Bertoldi, A., ... Potkin, S. (2003). Clozapine treatment for suicidality in schizophrenia: International Suicide Prevention Trial (InterSePT). *Archives of General Psychiatry*, *60*(1), 82-91. doi:10.1001/archpsyc.60.1.82
- Miller, I. W., Gaudiano, B. A., & Weinstock, L. M. (2016). The coping long term with active suicide program: Description and pilot data. *Suicide & life-threatening behavior*, *46*(6), 752-761. doi: 10.1111/sltb.12247

- Morey, L. C., Lowmaster, S. E., & Hopwood, C. J. (2010). A pilot study of manual-assisted cognitive therapy with a therapeutic assessment augmentation for borderline personality disorder. *Psychiatry Research, 178*(3), 531-535.  
doi: 10.1016/j.psychres.2010.04.055
- Morley, K. C., Sitharthan, G., Haber, P. S., Tucker, P., & Sitharthan, T. (2014). The efficacy of an opportunistic cognitive behavioral intervention package (OCB) on substance use and comorbid suicide risk: A multisite randomized controlled trial. *Journal of Consulting and Clinical Psychology, 82*(1), 130-140. doi: 10.1037/a0035310
- Morthorst, B., Krogh, J., Erlangsen, A., Alberdi, F., & Nordentoft, M. (2012). Effect of assertive outreach after suicide attempt in the AID (assertive intervention for deliberate self-harm) trial: Randomised controlled trial. *BMJ (Clinical research ed.), 345*, e4972.  
doi:10.1136/bmj.e4972
- Motto, J. A. and Bostrom, A. G. (2001). A randomized controlled trial of postcrisis suicide prevention. *Psychiatric Services, 52*(6), 828-833.  
doi.org/10.1176/appi.ps.52.6.828
- Mouaffak, F., Marchand, A., Castaigne, E., Arnoux, A., & Hardy, P. (2015). OSTA program: A French follow up intervention program for suicide prevention. *Psychiatry Research, 230*(3), 913-918. doi: 10.1016/j.psychres.2015.11.024
- Muhlmann, C., Madsen, T., Hjorthoj, C., Kerkhof, A., Nordentoft, M., & Erlangsen, A. (2017). The self-help online against suicidal thoughts (SOS) trial: Study protocol for a randomized controlled trial. *Trials, 18*(1), 45. doi: 10.1186/s13063-017-1794-x
- Murrough, J., Soleimani, L., Dewilde, K., Collins, K., Lapidus, K., Lacoviello, B., ... Charney, D. (2015). Ketamine for rapid reduction of suicidal ideation: A

randomized controlled trial. *Psychological Medicine*, 45(16), 3571-3580.

doi:10.1017/S0033291715001506

Norr, A. M., Smolenski, D. J., & Reger, G. M. (2018). Effects of prolonged exposure and virtual reality exposure on suicidal ideation in active duty soldiers: An examination of potential mechanisms. *Journal of Psychiatric Research*, 103, 69-74. doi:

10.1016/j.jpsychires.2018.05.009

O'Connor, R. C., Ferguson, E., Scott, F., Smyth, R., McDaid, D., Park, A. L., Beautrais, A., ...

Armitage, C. J. (2017). A brief psychological intervention to reduce repetition of self-

harm in patients admitted to hospital following a suicide attempt: a randomised controlled

trial. *The lancet. Psychiatry*, 4(6), 451-460. doi: [10.1016/S2215-0366\(17\)30129-3](https://doi.org/10.1016/S2215-0366(17)30129-3)

Oquendo, M. A., Galfalvy, H. C., Currier, D., Grunebaum, M. F., Sher, L., Sullivan, G.,

... Mann, J. J. (2011). Treatment of suicide attempters with bipolar disorder: A

randomized clinical trial comparing lithium and valproate in the prevention of

suicidal behavior. *American Journal of Psychiatry*, 168(10), 1050-1056. doi:

10.1176/appi.ajp.2011.11010163

Philips, B., Wennberg, P., Konradsson, P., & Franck, J. (2018). Mentalization-based treatment

for concurrent borderline personality disorder and substance use disorder: A randomized

controlled feasibility study. *European Addiction Research*, 24(1), 1-8.

doi: [10.1159/000485564](https://doi.org/10.1159/000485564)

Pineda, J. and Dadds, M. R. (2013). Family intervention for adolescents with suicidal behavior:

A randomized controlled trial and mediation analysis. *Journal of the American Academy*

*of Child and Adolescent Psychiatry*, 52(8), 851-862. DOI:10.1016/j.jaac.2013.05.015

- Pistorello, J., Fruzzetti, A. E., Maclane, C., Gallop, R., & Iverson, K. M. (2012). Dialectical behavior therapy (DBT) applied to college students: A randomized clinical trial. *Journal of consulting and clinical psychology, 80*(6), 982-94. doi: 10.1037/a0029096
- Power, P. J., Bell, R. J., Mills, R., Herman-Doig, T., Davern, M., Henry, L., ...McGorry, P. D. (2003). Suicide prevention in first episode psychosis: The development of a randomised controlled trial of cognitive therapy for acutely suicidal patients with early psychosis. *Australian and New Zealand Journal of Psychiatry, 37*(4), 414-420. doi.org/10.1046/j.1440-1614.2003.01209.x
- Pratt, D., Tarrier, N., Dunn, G., Awenat, Y., Shaw, J., Ulph, F., & Gooding, P. (2015). Cognitive-behavioural suicide prevention for male prisoners: A pilot randomized controlled trial. *Psychological medicine, 45*(16), 3441-51. doi: 10.1017/S0033291715001348
- Price, R. B., Iosifescu, D. V., Murrough, J. W., Chang, L. C., Al Jurdi, R. K., Iqbal, S. Z., ... Mathew, S. J. (2014). Effects of ketamine on explicit and implicit suicidal cognition: A randomized controlled trial in treatment-resistant depression. *Depression and Anxiety, 31*(4), 335-343. doi: 10.1002/da.22253
- Raines, A. M., Short, N. A., Allan, N. P., Oglesby, M. E., & Schmidt, N. B. (2015). Examination of a brief anxiety sensitivity cognitive concerns intervention on suicidality among individuals with obsessive-compulsive symptoms. *Contemporary Clinical Trials, 45*(Pt B), 191-195. doi: 10.1016/j.cct.2015.09.006
- Raj, M. A., Kumaraiah, V., & Bhide, A.V. (2001). Cognitive-behavioural intervention in deliberate self-harm. *Acta Psychiatrica Scandinavica, 104*(5), 340-345. doi.org/10.1034/j.1600-0447.2001.00075.x

- Randell, B. P., Eggert, L.L., & Pike, K.C. (2001). Immediate post intervention effects of two brief youth suicide prevention interventions. *Suicide and Life Threatening Behavior*, 31(1), 41-61. doi.org/10.1521/suli.31.1.41.21308
- Robinson, J., Yuen, H. P., Gook, S., Hughes, A., Cosgrave, E., Killackey, E., ... Yung, A. (2012). Can receipt of a regular postcard reduce suicide-related behaviour in young help seekers? A randomized controlled trial. *Early Intervention in Psychiatry*, 6(2), 145-152. doi: 10.1111/j.1751-7893.2011.00334.x
- Robinson, J., Hetrick, S., Cox, G., Bendall, S., Yung, A., Yuen, H. P., ...Pirkis, J. (2014). The development of a randomised controlled trial testing the effects of an online intervention among school students at risk of suicide. *BMC Psychiatry*, 14, 155. doi: 10.1186/1471-244X-14-155
- Rossouw, T. I. and P. Fonagy (2012). Mentalization-based treatment for self-harm in adolescents: A randomized controlled trial. *Journal of the American Academy of Child and Adolescent Psychiatry*, 51(12), 1304-1313.e1303. doi: 10.1016/j.jaac.2012.09.018
- Rucci, P., Frank, E., Scocco, P., Calugi, S., Miniati, M., Fagiolini, A., & Cassano, G. B. (2011). Treatment-emergent suicidal ideation during 4 months of acute management of unipolar major depression with SSRI pharmacotherapy or interpersonal psychotherapy in a randomized clinical trial. *Depression and anxiety*, 28(4), 303-9. doi: 10.1002/da.20758
- Rudd, D. M., Bryan, C. J., Wertenberger, E. G., Peterson, A. L., Young-McCaughan, S., Mintz, J., ...Bruce, T. O. (2015). Brief cognitive-behavioral therapy effects on post-treatment suicide attempts in a military sample: Results of a randomized clinical trial with 2-year follow-up. *American Journal of Psychiatry*, 172(5), 441-449. doi.org/10.1176/appi.ajp.2014.14070843

- Ryberg, W., Fosse, R., Zahl, P. H., Brorson, I., Møller, P., Landrø, N. I., & Jobes, D. (2016). Collaborative Assessment and Management of Suicidality (CAMS) compared to treatment as usual (TAU) for suicidal patients: Study protocol for a randomized controlled trial. *Trials*, *17*(1), 481. doi:10.1186/s13063-016-1602-z
- Shand, F. L., Ridani, R., Tighe, J., & Christensen, H. (2013). The effectiveness of a suicide prevention app for indigenous Australian youths: Study protocol for a randomized controlled trial. *Trials*, *14*, 396. doi:10.1186/1745-6215-14-396
- Simon, G. E., Beck, A., Rossom, R., Richards, J., Kirlin, B., King, D., ... Whiteside, U. (2016). Population-based outreach versus care as usual to prevent suicide attempt: study protocol for a randomized controlled trial. *Trials*, *17*(1), 452. doi:10.1186/s13063-016-1566-z
- Sinniah, A., Oei, T. P. S., Maniam, T., & Subramaniam, P. (2017). Positive effects of Individual Cognitive Behavior Therapy for patients with unipolar mood disorders with suicidal ideation in Malaysia: A randomised controlled trial. *Psychiatry Research*, *254*, 179-189. doi: 10.1016/j.psychres.2017.04.026
- Sturm, J., Ploderl, M., Fartacek, C., Kralovec, K., Neunhauserer, D., Niederseer, D., ... Fartacek, R. (2012). Physical exercise through mountain hiking in high-risk suicide patients. A randomized crossover trial. *Acta Psychiatrica Scandinavica*, *126*(6), 467-475. doi: 10.1111/j.1600-0447.2012.01860.x
- Tang, T. C., Jou, S. H., Ko, C. H., Huang, S. Y., & Yen, C. F. (2009). Randomized study of school-based intensive interpersonal psychotherapy for depressed adolescents with suicidal risk and parasuicide behaviors. *Psychiatry and Clinical Neurosciences*, *63*(4), 463-470. doi: 10.1111/j.1440-1819.2009.01991.x
- Tarrier, N., Kelly, J., Maqsood, S., Snelson, N., Maxwell, J., Law, H., ... Gooding, P. (2014). The

cognitive behavioural prevention of suicide in psychosis: A clinical trial. *Schizophrenia Research*, 156(2-3), 204-210. doi: 10.1016/j.schres.2014.04.029

Tighe, J., Shand, F., Ridani, R., Mackinnon, A., De La Mata, N., & Christensen, H. (2017). Ibbobly mobile health intervention for suicide prevention in Australian Indigenous youth: A pilot randomised controlled trial. *BMJ open*, 7(1), e013518. doi:10.1136/bmjopen-2016-013518

Till, B., Tran, U. S., Voracek, M., & Niederkrotenthaler, T. (2017). Beneficial and harmful effects of educative suicide prevention websites: Randomised controlled trial exploring Papageno v. Werther effects. *British Journal of Psychiatry*, 211(2), 109-115. doi: 10.1192/bjp.bp.115.177394

Tyrer, P., Thompson, S., Schmidt, U, Jones, V., Knapp, M., Davidson, K., ...Wessely, S. (2003). Randomized controlled trial of brief cognitive behaviour therapy versus treatment as usual in recurrent deliberate self-harm: the POPMACT study. *Psychological Medicine*, 33(6), 969-976. doi.org/10.1017/S0033291703008171

Unutzer, J., Tang, L., Oishi, S., Katon, W., Williams, J. W., Jr., Hunkeler, E., ...Langston, C. (2006). Reducing suicidal ideation in depressed older primary care patients. *Journal of the American Geriatrics Society*, 54(10), 1550-1556. doi.org/10.1111/j.1532-5415.2006.00882.x

van Beek, W., Kerkhof, A., & Beekman, A. (2009). Future oriented group training for suicidal patients: A randomized clinical trial. *BMC psychiatry*, 9, 65. doi:10.1186/1471-244X-9-65

van den Bosch, L. M., Sinnaeve, R., Hakkaart-van Roijen, L., & van Furth, E. F. (2014). Efficacy and cost-effectiveness of an experimental short-term inpatient Dialectical

Behavior Therapy (DBT) program: study protocol for a randomized controlled trial. *Trials*, *15*, 152. doi:10.1186/1745-6215-15-152

Van Orden, K. A., Stone, D. M., Rowe, J., McIntosh, W. L., Podgorski, C., & Conwell, Y.

(2013). The Senior Connection: Design and rationale of a randomized trial of peer companionship to reduce suicide risk in later life. *Contemporary clinical trials*, *35*(1), 117-26. doi: 10.1016/j.cct.2013.03.003

van Spijker, B. A., van Straten, A., & Kerkhof, A. J. (2014). Effectiveness of online self-help for

suicidal thoughts: Results of a randomised controlled trial. *PLoS ONE*, *9*(2), e90118. doi.org/10.1371/journal.pone.0090118

van Spijker, B. A., Callear, A. L., Batterham, P. J., Mackinnon, A. J., Gosling, J. A., Kerkhof, A.,

... Christensen, H. (2015). Reducing suicidal thoughts in the Australian general population through web-based self-help: Study protocol for a randomized controlled trial. *Trials*, *16*, 62. doi:10.1186/s13063-015-0589-1

Verheul, R., Van Den Bosch, L. M., Koeter, M. W., De Ridder, M. A., Stijnen, T., & Van Den

Brink, W. (2003). Dialectical behaviour therapy for women with borderline personality disorder: 12-month, randomised clinical trial in The Netherlands. *British Journal of Psychiatry*, *182*, 135-140. DOI: 10.1192/bjp.182.2.135

Walsh, E., Harvey, K., White, I., Higgitt, A., Fraser, J., & Murray, R. (2001). Suicidal behaviour

in psychosis: Prevalence and predictors from a randomised controlled trial of case management: Report from the UK700 trial. *British Journal of Psychiatry*, *178*, 255-260. DOI: 10.1192/bjp.178.3.255

Wang, Y. C., Hsieh, L. Y., Wang, M. Y., Chou, C. H., Huang, M. W., & Ko, J. C. (2016).

Coping card usage can further reduce suicide reattempt in suicide attempter



case management within 3-month intervention. *Suicide and Life Threatening Behavior*, 46(1), 106-120. doi: 10.1111/sltb.12177

Ward-Ciesielski, E. F., Jones, C. B., Wielgus, M. D., Wilks, C. R., & Linehan, M. M. (2016). Single-session dialectical behavior therapy skills training versus relaxation training for non-treatment-engaged suicidal adults: A randomized controlled trial. *BMC psychology*, 4, 13. doi:10.1186/s40359-016-0117-4

Wasserman, D., Hove, C. W., Wasserman, C., Wall, M., Eisenberg, R., Hadlaczky, G., ...Kelleher, I. (2015). School-based suicide prevention programmes: The SEYLE cluster-randomised, controlled trial. *Lancet*, 385(9977), 1536-1544. doi: 10.1016/S0140-6736(14)61213-7

Weinberg, I., Gunderson, J. G., Hennen, J., & Cutter, C. J. Jr. (2006). Manual assisted cognitive treatment for deliberate self-harm in borderline personality disorder patients. *Journal of Personality Disorders*, 20(5), 482-492. doi.org/10.1521/pedi.2006.20.5.482

Weinstein, S. M., Cruz, R. A., Isaia, A. R., Peters, A. T., & West, A. E. (2017). Child- and family-focused cognitive behavioral therapy for pediatric bipolar disorder: Applications for suicide prevention. *Suicide and Life Threatening Behavior*. doi: 10.1111/sltb.12416

Wilks, C. R., Lungu, A., Ang, S. Y., Matsumiya, B., Yin, Q., & Linehan, M. M. (2018). A randomized controlled trial of an internet delivered dialectical behavior therapy skills training for suicidal and heavy episodic drinkers. *Journal of Affective Disorders*, 232, 219-228. doi: 10.1016/j.jad.2018.02.053

Wittouck, C., Van Autreve, S., Portzky, G., & van Heeringen, K. (2014). A CBT-based psychoeducational intervention for suicide survivors: A cluster randomized controlled study. *Crisis*, 35(3), 193-201. doi: 10.1027/0227-5910/a000252

- Wood, A., Trainor, G., Rothwell, J., Moore, A., & Harrington, R. (2001). Randomized trial of group therapy for repeated deliberate self-harm in adolescents. *Journal of the American Academy of Child and Adolescent Psychiatry*, *40*(11), 1246-1253.  
doi.org/10.1097/00004583-200111000-00003
- Yovell, Y., Bar, G., Mashiah, M., Baruch, Y., Briskman, I., Asherov, J., ... Panksepp, J. (2016). Ultra-low-dose buprenorphine as a time-limited treatment for severe suicidal ideation: A randomized controlled trial. *American Journal of Psychiatry*, *173*(5), 491-498. doi: 10.1176/appi.ajp.2015.15040535
- Zhang, H., Neelarambam, K., Schwenke, T. J., Rhodes, M. N., Pittman, D. M., & Kaslow, N. J. (2013). Mediators of a culturally-sensitive intervention for suicidal African American women. *Journal of clinical psychology in medical settings*, *20*(4), 401-14.  
doi: 10.1007/s10880-013-9373-0
- Zisook, S., Kascow, J. W., Lanouette, N. M., Golshan, S., Fellows, I., Vahia, I., ... Rao, S. (2010). Augmentation with citalopram for suicidal ideation in middle-aged and older outpatients with schizophrenia and schizoaffective disorder who have subthreshold depressive symptoms: A randomized controlled trial. *Journal of Clinical Psychiatry*, *71*(7), 915-922. DOI: 10.4088/JCP.09m05699gre}
